# Supplementary material
Source: MDPI journal article supplement (https://www.mdpi.com/2297-8739/10/8/437)
Supplement: s1 [file s1]

**Table S1.** Physicochemical properties of tests solutes

| Fragment | Name                                              | Cas Number  | log D (pH 7.4) | Charge   | H-Bond Donor Count (PubChem) | H-Bond Acceptor Count (PubChem) |
|----------|---------------------------------------------------|-------------|----------------|----------|------------------------------|---------------------------------|
| 1        | Benzylamine                                       | 100-46-9    | -0,56          | cationic | 1                            | 1                               |
| 41       | 5-Phenyl-2-furoic acid                            | 52938-97-3  | -0,35          | anionic  | 1                            | 3                               |
| 54       | 4-(Aminomethyl)pyridine                           | 3731-53-1   | -1,3           | cationic | 1                            | 2                               |
| 57       | Histamine                                         | 51-45-6     | -2,71          | cationic | 2                            | 2                               |
| 62       | 2-Phenylimidazole                                 | 670-96-2    | 1,64           | neutral  | 1                            | 1                               |
| 66       | 1,1,4,7,10,10-Hexamethyltriethylenetetramine      | 4856-97-7   | 0,57           | neutral  | 2                            | 2                               |
| 70       | 4-(2-Keto-1-benzimidazolyl)piperidine             | 20662-53-7  | -1,13          | cationic | 2                            | 2                               |
| 74       | 2,2'-(Ethane-1,2-diyl)dianiline                   | 34124-14-6  | 1,99           | neutral  | 2                            | 2                               |
| 88       | Thieno[3,2-b]pyridin-7-ol                         | 107818-20-2 | -0,34          | neutral  | 1                            | 3                               |
| 93       | 4,4'-Dihydroxybiphenyl                            | 92-88-6     | 2,26           | neutral  | 2                            | 2                               |
| 117      | 2-Amino-3-benzoyloxy pyridine                     | 24016-03-3  | 1,53           | neutral  | 1                            | 3                               |
| 125      | 1-Methyl-2-pyrrolicarboxylic acid                 | 6973-60-0   | -1,86          | anionic  | 1                            | 2                               |
| 139      | 2-Phenyl-2-imidazoline                            | 936-49-2    | -0,59          | cationic | 1                            | 1                               |
| 150      | Salicylic acid                                    | 69-72-7     | -0,77          | anionic  | 2                            | 3                               |
| 153      | 2,4-Dihydroxybenzophenone                         | 131-56-6    | 3,16           | anionic  | 2                            | 3                               |
| 159      | 3-Furoic acid                                     | 488-93-7    | -1,97          | anionic  | 1                            | 3                               |
| 161      | Sulfacetamide                                     | 144-80-9    | -2,17          | anionic  | 2                            | 4                               |
| 168      | 3-Cyano-6-methyl-2(1H)-pyridinone                 | 4241-27-4   | -0,29          | neutral  | 1                            | 2                               |
| 169      | Sulfabenzamide                                    | 127-71-9    | -0,62          | anionic  | 2                            | 4                               |
| 195      | 1-Benzoylpiperidine                               | 776-75-0    | 1,95           | neutral  | 0                            | 1                               |
| 209      | Biphenyl-4-carboxylic acid                        | 92-92-2     | 0,67           | anionic  | 1                            | 2                               |
| 266      | Benzhydrylamine                                   | 91-00-9     | 1,65           | cationic | 1                            | 1                               |
| 271      | 1,2,3,4-Tetrahydro-9-aminoacridine                | 321-64-2    | 0,89           | cationic | 1                            | 2                               |
| 286      | (1R,2S)-(-)-2-Amino-1,2-diphenylethanol           | 23190-16-1  | -0,08          | cationic | 2                            | 2                               |
| 288      | 2,3-Diaminopyridine                               | 452-58-4    | 0,12           | cationic | 2                            | 3                               |
| 294      | 1-(1H-Pyrrol-2-yl)ethanone                        | 1072-83-9   | 0,99           | neutral  | 1                            | 1                               |
| 297      | 5-Amino-1-phenylpyrazole-4-carboxamide            | 50427-77-5  | 0,83           | neutral  | 2                            | 3                               |
| 298      | 1-Phenyl-1,2,3,4-tetrahydropyrrolo[1,2-a]pyrazine | 112758-89-1 | 2,53           | cationic | 1                            | 1                               |
| 302      | 4-Aminobiphenyl                                   | 92-67-1     | 2,71           | neutral  | 1                            | 1                               |
| 336      | trans-Ferulic acid                                | 537-98-4    | -1,38          | anionic  | 2                            | 4                               |
| 346      | 2-Thiouracil                                      | 141-90-2    | -3,6           | neutral  | 2                            | 2                               |
| 366      | 3-Amino-2-chloropyridine                          | 6298-19-7   | 0,97           | neutral  | 1                            | 2                               |
| 368      | 4-Aminopyridine                                   | 504-24-5    | -2,41          | cationic | 1                            | 2                               |
| 378      | 2,6-Dichloropyridine                              | 2402-78-0   | 2,1            | neutral  | 0                            | 1                               |
| 393      | 1-(4-Sulfophenyl)-3-methyl-5-pyrazolone           | 89-36-1     | -4,31          | anionic  | 1                            | 5                               |
| 411      | Ethyl 5-amino-1-phenyl-4-pyrazolecarboxylate      | 16078-71-0  | 2,79           | neutral  | 1                            | 4                               |
| 412      | 2-(carboxymethylthio)-4-methylpyrimidine          | 46118-95-0  | -3,15          | anionic  | 1                            | 5                               |
| 445      | 4-Aminohippuric acid                              | 61-78-9     | -4             | anionic  | 3                            | 4                               |
| 449      | Orotic acid                                       | 65-86-1     | -4,75          | anionic  | 3                            | 4                               |
| 725      | Adenine                                           | 73-24-5     | -2,06          | neutral  | 2                            | 4                               |
| 771      | 4-Chlorophenyl methyl sulfone                     | 98-57-7     | 1,45           | neutral  | 0                            | 2                               |

| Fragment | Name                                              | Cas Number  | log D (pH 7.4) | Global charge | H-Bond Donor Count (PubChem) | H-Bond Acceptor Count (PubChem) |
|----------|---------------------------------------------------|-------------|----------------|---------------|------------------------------|---------------------------------|
| 1        | Benzylamine                                       | 100-46-9    | -0,56          | 1             | 1                            | 1                               |
| 41       | 5-Phenyl-2-furoic acid                            | 52938-97-3  | -0,35          | -1            | 1                            | 3                               |
| 54       | 4-(Aminomethyl)pyridine                           | 3731-53-1   | -1,3           | 1             | 1                            | 2                               |
| 57       | Histamine                                         | 51-45-6     | -2,71          | 1,8           | 2                            | 2                               |
| 62       | 2-Phenylimidazole                                 | 670-96-2    | 1,64           | 0,3           | 1                            | 1                               |
| 66       | 1,1,4,7,10,10-Hexamethyltriethylenetetramine      | 4856-97-7   | 0,57           | 0             | 2                            | 2                               |
| 70       | 4-(2-Keto-1-benzimidazolyl)piperidine             | 20662-53-7  | -1,13          | 1             | 2                            | 2                               |
| 74       | 2,2'-(Ethane-1,2-diyl)dianiline                   | 34124-14-6  | 1,99           | 0             | 2                            | 2                               |
| 88       | Thieno[3,2-b]pyridin-7-ol                         | 107818-20-2 | -0,34          | 0             | 1                            | 3                               |
| 93       | 4,4'-Dihydroxybiphenyl                            | 92-88-6     | 2,26           | 0             | 2                            | 2                               |
| 117      | 2-Amino-3-benzoyloxy pyridine                     | 24016-03-3  | 1,53           | 0             | 1                            | 3                               |
| 125      | 1-Methyl-2-pyrrolicarboxylic acid                 | 6973-60-0   | -1,86          | -1            | 1                            | 2                               |
| 139      | 2-Phenyl-2-imidazoline                            | 936-49-2    | -0,59          | 1             | 1                            | 1                               |
| 150      | Salicylic acid                                    | 69-72-7     | -0,77          | -1            | 2                            | 3                               |
| 153      | 2,4-Dihydroxybenzophenone                         | 131-56-6    | 3,16           | -0,5          | 2                            | 3                               |
| 159      | 3-Furoic acid                                     | 488-93-7    | -1,97          | -1            | 1                            | 3                               |
| 161      | Sulfacetamide                                     | 144-80-9    | -2,17          | -1            | 2                            | 4                               |
| 168      | 3-Cyano-6-methyl-2(1H)-pyridinone                 | 4241-27-4   | -0,29          | -0,3          | 1                            | 2                               |
| 169      | Sulfabenzamide                                    | 127-71-9    | -0,62          | -1            | 2                            | 4                               |
| 195      | 1-Benzoylpiperidine                               | 776-75-0    | 1,95           | 0             | 0                            | 1                               |
| 209      | Biphenyl-4-carboxylic acid                        | 92-92-2     | 0,67           | -1            | 1                            | 2                               |
| 266      | Benzhydrylamine                                   | 91-00-9     | 1,65           | 1             | 1                            | 1                               |
| 271      | 1,2,3,4-Tetrahydro-9-aminoacridine                | 321-64-2    | 0,89           | 1             | 1                            | 2                               |
| 286      | (1R,2S)-(-)-2-Amino-1,2-diphenylethanol           | 23190-16-1  | -0,08          | 1             | 2                            | 2                               |
| 288      | 2,3-Diaminopyridine                               | 452-58-4    | 0,12           | 0,5           | 2                            | 3                               |
| 294      | 1-(1H-Pyrrol-2-yl)ethanone                        | 1072-83-9   | 0,99           | 0             | 1                            | 1                               |
| 297      | 5-Amino-1-phenylpyrazole-4-carboxamide            | 50427-77-5  | 0,83           | 0             | 2                            | 3                               |
| 298      | 1-Phenyl-1,2,3,4-tetrahydropyrrolo[1,2-a]pyrazine | 112758-89-1 | 2,53           | 0,7           | 1                            | 1                               |
| 302      | 4-Aminobiphenyl                                   | 92-67-1     | 2,71           | 0             | 1                            | 1                               |
| 336      | trans-Ferulic acid                                | 537-98-4    | -1,38          | -1            | 2                            | 4                               |
| 346      | 2-Thiouracil                                      | 141-90-2    | -3,6           | -0,2          | 2                            | 2                               |
| 366      | 3-Amino-2-chloropyridine                          | 6298-19-7   | 0,97           | 0             | 1                            | 2                               |
| 368      | 4-Aminopyridine                                   | 504-24-5    | -2,41          | 1             | 1                            | 2                               |
| 378      | 2,6-Dichloropyridine                              | 2402-78-0   | 2,1            | 0             | 0                            | 1                               |
| 393      | 1-(4-Sulfophenyl)-3-methyl-5-pyrazolone           | 89-36-1     | -4,31          | -1            | 1                            | 5                               |
| 411      | Ethyl 5-amino-1-phenyl-4-pyrazolecarboxylate      | 16078-71-0  | 2,79           | 0             | 1                            | 4                               |
| 412      | 2-(carboxymethylthio)-4-methylpyrimidine          | 46118-95-0  | -3,15          | -1            | 1                            | 5                               |
| 445      | 4-Aminohippuric acid                              | 61-78-9     | -4             | -1            | 3                            | 4                               |
| 449      | Orotic acid                                       | 65-86-1     | -4,75          | -1            | 3                            | 4                               |
| 725      | Adenine                                           | 73-24-5     | -2,06          | 0             | 2                            | 4                               |
| 771      | 4-Chlorophenyl methyl sulfone                     | 98-57-7     | 1,45           | 0             | 0                            | 2                               |

- Nano-FAC data processing for column characterization (protein specific interactions (active binding sites, affinity (dissociation constant)) and non-specific interactions)

Nano-FAC experiments were used to determine the quantity of ligand capture at different ligand concentrations ( $q_{\text{captured}}$ ). In staircase method, increasing concentrations of ligand were continuously injected into the nanocolumn (Figure S1 A). This allows to determine the cumulative captured quantities ( $q_{\text{captured cumul.}}$ ) of ligand at each concentration step ( $n$ ).

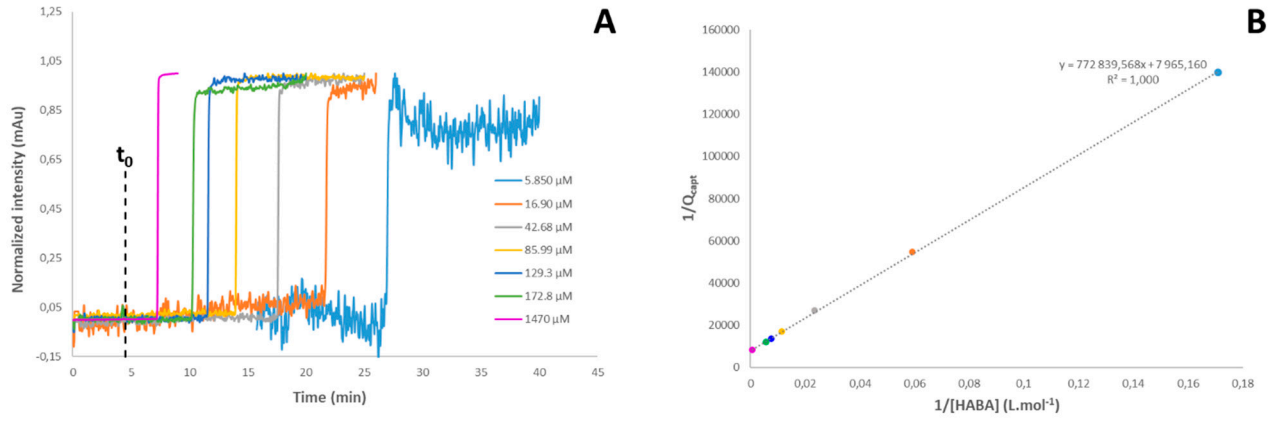

**Figure S1.** Frontal affinity chromatograms of 4'-Hydroxyazobenzene-2-carboxylic acid (HABA) on streptavidin-functionalized poly(DHPMA-co-MBA) monolith. A) Breakthrough curves of HABA at different concentrations in phosphate buffer (67mM, pH 7.4); UV detection at 347 nm; short injection of DMSO 0.1 % in water was used to mark the dead time. B) Plot of the reciprocal of the quantity of the specific captured quantity of HABA minus the non-specific captured quantity of HABA ( $1/(\text{cumul}Q_{\text{capt}} - (K_{\text{NS}} \times [\text{HABA}]))$ ) ( $\mu\text{mol}^{-1}$ ) versus the reciprocal of HABA concentration ( $1/[\text{HABA}]$ ) ( $\text{L.mol}^{-1}$ )

If only specific interactions are observed, the plot of  $1/q_{\text{Cumul captured}}(n)$  vs  $1/[L]_n$  is linear. A deviation from linearity in the high concentration region of the plot indicates the presence of a non-specific interaction contribution. For unspecific interactions (if any),  $q_{\text{Cumul captured}}(n)$  is the sum of the amounts bound by specific interactions  $\frac{B_{\text{act}} \times [L]_n}{K_d + [L]_n}$  and the amount of ligand captured by non-specific interactions  $K_{\text{non-specific}} \times [L]_n$ , leading to equation S1:

$$q_{\text{Cumul captured}}(n) = \frac{B_{\text{act}} \times [L]_n}{K_d + [L]_n} + K_{\text{non-specific}} \times [L]_n \quad (\text{Equation S1})$$

Assuming  $K_{\text{non-specific}}$  is constant, equation S1 can be written as follows:

$$\frac{1}{q_{\text{captured}} - K_{\text{non-specific}} \times [L]_n} = \frac{K_d}{B_{\text{act}}} \times \frac{1}{[L]_n} + \frac{1}{B_{\text{act}}} \quad (\text{Equation S2})$$

The excel solver function is used to compute the  $K_{\text{non-specific}}$  factor for which the best  $r^2$  value is reached.

In case of presence of non-specific interaction, to determine the number of active site ( $B_{\text{act}}$ ) and dissociation constant properly the plot of  $1/[q_{\text{cumul Capt}}(n) - (K_{\text{NS}} \times [L]_n)]$  vs  $1/[L]_n$  was used (figure S1B right).
